# Supplementary material for: Application of super-resolution and correlative double sampling in cryo-electron microscopy
Source: Royal Society of Chemistry journal article supplement (doi:10.1039/d2fd00049k), 2022-01-01
Supplement: d2fd00049k2.pdf [file d2fd00049k2.pdf]

## Supplementary Material

Sup Table 1 Previously published High resolution structures of apoferritin

| Scope<br>Detector<br>Species              | Mag   | Pixel<br>size Å | Total<br>dose<br>e/ Å <sup>2</sup> | N. of<br>frames | N. of<br>movies<br>collected | N. of<br>movie<br>s used | Defocus<br>range | Picked<br>particles | Particles<br>used | Res<br>Å |
|-------------------------------------------|-------|-----------------|------------------------------------|-----------------|------------------------------|--------------------------|------------------|---------------------|-------------------|----------|
| Krios<br>F3<br>Human<br>[3]               | 120K  | 0.492           | 50                                 | 40f<br>(18.54s) | 10398                        | *                        | 0.3-1            | 1.47M               | 1.1M              | 1.25     |
| Krios<br>F3<br>Human<br>[3]               | 120K  | 0.492           | 50                                 | 40f<br>(18.54s) | 10398                        | *                        | 0.3-1            | 1.47M               | 800K              | 1.15     |
| Krios<br>Selectris<br>F4<br>Mouse<br>[5]  | 155K* | 0.457           | 40                                 | 434eer<br>(2s)  | 3370                         | 3080                     |                  | 430K                | 360K              | 1.22     |
| Krios<br>Gif-K3<br>Human<br>[4]           | 215K  | 0.4             | 45                                 | 30f<br>(0.5s)   | 8034                         | 6951                     | 0.3-1.3          | 1.2M                | 900K              | 1.34     |
| Krios<br>F4<br>Human<br>[4]               | 155K  | 0.502           | 40                                 | 40f<br>(2s)     | 7734                         | 5427                     | 0.3-1.3          | 700K                | 500K              | 1.36     |
| cryoARM<br>K2<br>Mouse<br>[13]            | 100K  | 0.49*<br>or 0.3 | 32                                 | *               | *                            | *                        | 0.3-3            | 120K                | 110K              | 1.34     |
| Krios<br>Gif-K3<br>CDS<br>Mouse<br>[10]   | 105K  | 0.834           | 69                                 | 120f<br>(6s)    | 1035                         | *                        | 0.3-0.7          | *                   | 570k              | 1.65     |
| Krios<br>Gif-K3<br>CDS<br>Mouse<br>[10]   | 64K   | 1.346           | 69                                 | 120f<br>(15.6)  | 1032                         |                          | 0.3-0.7          | *                   | 373K              | 1.8      |
| Krios G4<br>Gif-K3<br>Mouse<br>[6]        | 215K  | 0.6             | 65                                 | *EMDB           | 3472                         | *                        | 0.2-0.8          | *                   | 185K              | 1.31     |
| Falcon 4 no<br>filter EER<br>Mouse<br>[6] | 195K  | 0.6             | 50                                 | *EMDB           | 3540                         | *                        | 0.2-1            | *                   | 135K              | 1.43     |

## Supplementary Figure Legends

#### Sup Fig 1 FSC curves tomography

FSC curves calculated with emClarity for the STA structures from the two-tilt series data set (A), six-tilt series data set (B), the 27-tilt series data set processed at non-SR (C) and SR (D).

#### Sup Fig 2 STA structures from 2-, 6-, and 27-tilt series data sets

A central slice through the STA structure of apoferritin from two-tilt series (A), six-tilt series STA apoferritin structure (B), 27-tilt series STA apoferritin structure (C), and the 27-tilt series SR STA apoferritin structure (D). The individual panels were generated using chimera.

#### Sup Fig 3 FSC curves SPA

FSC curves were calculated with Relion for the SPA structures from the 64K CDS SR data set (A), the 81K CDS SR data set (B), 130K CDS data set (C), and 130K EPU SR-bin2 (D).

#### Sup Fig 4 STA structure resolution comparisons

To demonstrate the features visible at different map resolutions, we compared a helix from residues 137-151 from the 27-tilt series non-SR STA reconstruction (A), SR STA reconstruction (B), the non-SR STA reconstruction calculated with cisTEM and sharpened in Relion (C), a 64K CDS SPA reconstruction from 13K particles (D), a 64K CDS SR SPA reconstruction from 54K particles (E) and the EMD-11603 STA reconstruction (F). The individual panels were generated using chimera.

#### Sup Fig 5 SPA non-SR reconstructions from 64K and 81K

The non-SR 64K SPA reconstruction with coordinates of apoferritin (top row A) and the non-SR 81K SPA apoferritin reconstruction with coordinates (bottom row B). Each of the panels is arranged with a helix from residues 137-151 shown on the left, a slice through the structure showing the water molecules in the middle, and the sodium binding site shown on the right. The individual panels were generated using chimera.

Sup Fig 6 Motion corrected summed movies and their power spectra in both non-SR and SR  
A motion-corrected summed movie with its power spectra shown in non-SR and SR form 64K CDS data set (top row), the 81K data set (middle row), and the 130k data without the SR power spectra. The 2.1 Å reflections from the graphene layer on the grids are highlighted with red circles.

#### Sup Fig 7 SPA comparison between CDS SR and non-CDS non-SR

The 130K CDS SPA reconstruction with coordinates of apoferritin (top row A) and the 130K non CDS EPU-SRbin2 SPA apoferritin reconstruction with coordinates (bottom row B). Each of the panels is arranged with a helix from residues 137-151 shown on the left, a slice through the structure showing the water molecules in the middle, and the sodium binding site shown on the right. The individual panels were generated using chimera.

#### Sup Fig 8 B-factor plots

The B-factor plots were calculated from the 130K CDS SPA data sets (A), the 130K non CDS EPU-SR bin2 SPA data set (B), and the 64K CDS SR data set (C).

#### Sup Fig 9 Molprobrity statistics for complete apoferritin complex
